# Supplementary material for: Flexible combination of multiple diagnostic biomarkers to improve diagnostic accuracy
Source: PubMed Central journal article supplement (PMC4628350; doi:10.1186/s12874-015-0085-z), 2015-10-31
Supplement: 12874_2015_85_MOESM1_ESM.pdf [file 12874_2015_85_MOESM1_ESM.pdf]

# Appendix for "Flexible combination of multiple diagnostic biomarkers to improve diagnostic accuracy" by Xu, Rong, Fang and Wang

**Proof of Proposition 1.** Since  $L_\delta(u) = L_{01}(u) + \delta^{-1}(\delta - u)I(0 \leq u \leq \delta)$ , we have

$$\begin{aligned} E\left(w(Y, \mathbf{Z})L_\delta(Y(g(\mathbf{X}) - c(\mathbf{Z})))\right) &= E\left(w(Y, \mathbf{Z})L_{01}(Y(g(\mathbf{X}) - c(\mathbf{Z})))\right) \\ &\quad + E\left(w(Y, \mathbf{Z})\frac{\delta - Y(g(\mathbf{X}) - c(\mathbf{Z}))}{\delta}I(0 \leq Y(g(\mathbf{X}) - c(\mathbf{Z})) \leq \delta)\right). \end{aligned} \quad (1)$$

Note that  $E\left(w(Y, \mathbf{Z})\frac{\delta - Y(g(\mathbf{X}) - c(\mathbf{Z}))}{\delta}I(0 \leq Y(g(\mathbf{X}) - c(\mathbf{Z})) \leq \delta)\right)$  is decreasing in  $\delta$ , and approaches 0 when  $\delta \rightarrow 0$ . Furthermore, for any given  $\epsilon > 0$ ,

$$\begin{aligned} &E\left(w(Y, \mathbf{Z})L_{01}(Y(g(\mathbf{X}) - c(\mathbf{Z})))\right) - E\left(w(Y, \mathbf{Z})L_{01}(Y(g^*(\mathbf{X}) - c^*(\mathbf{Z})))\right) \\ &= \int_{\mathcal{D}_{g,c,0} \cap \mathcal{D}_{g^*,c^*,0}^c} \frac{\pi_{\mathbf{z}} - p_{\mathbf{z}}(\mathbf{x})}{\pi_{\mathbf{z}}(1 - \pi_{\mathbf{z}})} f(\tilde{\mathbf{x}}) d\tilde{\mathbf{x}} + \int_{\mathcal{D}_{g,c,0} \cap \mathcal{D}_{g^*,c^*,0}} \frac{p_{\mathbf{z}}(\mathbf{x}) - \pi_{\mathbf{z}}}{\pi_{\mathbf{z}}(1 - \pi_{\mathbf{z}})} f(\tilde{\mathbf{x}}) d\tilde{\mathbf{x}} \\ &\geq \int_{\mathcal{D}_{g,c,\epsilon} \cap \mathcal{D}_{g^*,c^*,\epsilon}^c} \frac{\pi_{\mathbf{z}} - p_{\mathbf{z}}(\mathbf{x})}{\pi_{\mathbf{z}}(1 - \pi_{\mathbf{z}})} f(\tilde{\mathbf{x}}) d\tilde{\mathbf{x}} + \int_{\mathcal{D}_{g,c,\epsilon}^c \cap \mathcal{D}_{g^*,c^*,\epsilon}} \frac{p_{\mathbf{z}}(\mathbf{x}) - \pi_{\mathbf{z}}}{\pi_{\mathbf{z}}(1 - \pi_{\mathbf{z}})} f(\tilde{\mathbf{x}}) d\tilde{\mathbf{x}}, \end{aligned} \quad (2)$$

where  $f(\tilde{\mathbf{x}})$  denotes the density function of  $\tilde{\mathbf{x}}$ . By (??), we have

$$\begin{cases} \pi_{\mathbf{z}} - p_{\mathbf{z}}(\mathbf{x}) > \epsilon, & \text{if } \tilde{\mathbf{x}} \in \mathcal{D}_{g,c,\epsilon} \cap \mathcal{D}_{g^*,c^*,\epsilon}^c; \\ p_{\mathbf{z}}(\mathbf{x}) - \pi_{\mathbf{z}} > \epsilon, & \text{if } \tilde{\mathbf{x}} \in \mathcal{D}_{g,c,\epsilon}^c \cap \mathcal{D}_{g^*,c^*,\epsilon}. \end{cases}$$

Therefore,

$$E\left(w(Y, \mathbf{Z})L_{01}(Y(g_\delta^*(\mathbf{X}) - c_\delta^*(\mathbf{Z})))\right) - E\left(w(Y, \mathbf{Z})L_{01}(Y(g^*(\mathbf{X}) - c^*(\mathbf{Z})))\right) > \epsilon Pr\left(\mathcal{D}_{g_\delta^*,c_\delta^*,\epsilon} \Delta \mathcal{D}_{g^*,c^*,\epsilon}\right).$$

By the fact that  $E\left(w(Y, \mathbf{Z})L_\delta(Y(g_\delta^*(\mathbf{X}) - c_\delta^*(\mathbf{Z})))\right) \leq E\left(w(Y, \mathbf{Z})L_\delta(Y(g^*(\mathbf{X}) - c^*(\mathbf{Z})))\right)$ , we have

$$\begin{aligned} &E\left(w(Y, \mathbf{Z})L_{01}(Y(g_\delta^*(\mathbf{X}) - c_\delta^*(\mathbf{Z})))\right) - E\left(w(Y, \mathbf{Z})L_{01}(Y(g^*(\mathbf{X}) - c^*(\mathbf{Z})))\right) \\ &\leq E\left(w(Y, \mathbf{Z})\frac{\delta - Y(g^*(\mathbf{X}) - c^*(\mathbf{Z}))}{\delta}I(0 \leq Y(g^*(\mathbf{X}) - c^*(\mathbf{Z})) \leq \delta)\right). \end{aligned} \quad (3)$$

It follows immediately that  $Pr\left(\mathcal{D}_{g_\delta^*,c_\delta^*,\epsilon} \Delta \mathcal{D}_{g^*,c^*,\epsilon}\right) \rightarrow 0$  as  $\delta \rightarrow 0$ . □
